# Supplementary material
Source: publisher figshare collection journal article supplement (https://gsapubs.figshare.com/ndownloader/files/23317970)
Supplement: Supplementary file 1 [file 23317970]

# 1 The role of groundwaters in the global carbon cycle: Insights 2 from the contiguous United States

3 Shuang Zhang<sup>12\*</sup>, Noah J. Planavsky<sup>1</sup>

4 <sup>1</sup>*Department of Geology and Geophysics, Yale University, New Haven, Connecticut 06520, USA*

5 <sup>2</sup>*Geophysical Laboratory, Carnegie Institution for Science, Washington, DC 20015, USA*

6

## 7 Supplement Text

### 8 DATA COMPILATION

9 Initially, we collected  $HCO_3^-$  from 159,319 wells and 38,103 river gauges, and discharge  
10 rates from 7,199 river gauges, across the continental United States from USGS archives. After  
11 data collection, we only selected samples that were analyzed following the “sample-routine”  
12 procedure. We further filtered out the samples that do not have reported values. Several types of  
13 streams are denoted by USGS, including ditch, canal, perennial stream, tidal stream, channelized  
14 stream, intermittent stream, ephemeral stream, pond-stormwater, and normal stream. To mitigate  
15 the human intervention on the river chemistry, we only selected the normal stream and the  
16 perennial stream as our research target. For both groundwaters and rivers, we further selected  
17 samples that have unique activity identifiers to avoid sampling ambiguity. As the bicarbonate  
18 concentrations for both groundwaters and rivers are extremely right skewed, we used 99%  
19 quantile as a cutoff to get rid of the extremely large values. We further selected the wells and  
20 river gauges that have at least one data point in each season, from which the annual bicarbonate  
21 concentration for each well and river gauge, and the annual discharge rates for each gauge, were  
22 calculated. We also joined the dataset of bicarbonate concentration and the dataset of discharge

rate at each gauge together. After tidying the data, we finally have 4258 data points for river and 3131 data points for groundwater.

## **[HCO<sub>3</sub><sup>-</sup>] IN GROUNDWATERS ALONG THE COASTLINE OF CONTIGUOUS UNITED STATES**

As most groundwaters will eventually discharge into ocean along the coastline, we further investigated the spatial distribution of HCO<sub>3</sub><sup>-</sup> in groundwaters by creating four buffer zones close to the coastline — a 5 km buffer, a 10 km buffer, a 25 km buffer and a 50 km buffer (Fig. DR3A). The statistical analysis shows that in all of these buffer zones, there is elevated groundwater [HCO<sub>3</sub><sup>-</sup>] in comparison with rivers, with Monte Carlo resampled means ranging from 186 to 215 mg/L for groundwater compared to 60 to 99 mg/L for river. The coastal groundwater/river [HCO<sub>3</sub><sup>-</sup>] ratio (2.2 to 3.2; Fig. DR3B) is similar across coastal buffer zones to the entire contiguous United States groundwater vs river [HCO<sub>3</sub><sup>-</sup>] ratio (2.4 in the main text).

## **MEAN [HCO<sub>3</sub><sup>-</sup>] IN GROUNDWATERS OF ADDITIONAL LOCATIONS BESIDES THOSE MONITORED BY USGS**

To achieve a more robust estimate of global mean groundwater [HCO<sub>3</sub><sup>-</sup>], we collected additional groundwater data from other locations in the US and other regions (Table DR1). These data points are from North Inlet of South Carolina (Cai et al., 2003), Okatee Estuary of South Carolina (Moore et al., 2006), Martinique and Guadeloupe volcanic island, Reunion volcanic island (Rad et al., 2007), northern South China Sea coastline (Liu et al., 2012), the Baltic Sea coastline (Szymczycha et al., 2014), Godavari estuary from India (Rengarajan and Sarma, 2015) and Taiwan coastal areas (Chen et al., 2018; Wang et al., 2018). Some studies only

list the concentration of dissolved inorganic carbon (DIC) in groundwater and we have to transform them to  $[HCO_3^-]$ . For groundwater samples, the dominant carbon species are usually  $[HCO_3^-]$ , especially at  $pH < 8.5$  (Schopka and Derry, 2012). This is further supported by the studies by Chen et al. (2018) and Wang et al. (2018), which analyzed the same batch of groundwater samples and showed that  $[HCO_3^-]$  amounts to ~94% of DIC (Table DR1). To make a conservative estimation, we multiplied the DIC in the relevant study with 90% to obtain a first-order  $[HCO_3^-]$ . After transformation, the  $[HCO_3^-]$  in the new groundwater samples ranges from 3.0 mmol/L to 7.1 mmol/L, with an exception of one sample with 14.4 mmol/L from Okatee Estuary of South Carolina. These new estimates are comparable to the mean of  $[HCO_3^-]$  in contiguous US (4.4 mmol/L). To make a more conservative estimation, we selected the majority range (from 3.0 mmol/L to 7.1 mmol/L) to sample from in order to obtain the global groundwater  $[HCO_3^-]$ .

## **“ONE-STEP APPROACH” AND “TWO-STEP APPROACH” FOR ESTIMATING FRESH SUBMARINE GROUNDWATER DISCHARGE**

In this study, we adopted two distinct approaches to estimate the fresh submarine groundwater discharge (SGD). The first one is numerical modeling, which we call “One-step approach” as it is a single calculation to estimate fresh SGD. The second one is empirical measurement, which we call “Two-step approach” as it needs to estimate both the mixed SGD and the proportion of fresh SGD in mixed SGD in order to obtain the fresh SGD.

The “One-step approach” can be further divided into two numerical modeling methods: the water balance model and the groundwater flow model. The water balance model calculates groundwater discharge by considering the balance between the recharge rate, export rate to

streams, evapotranspiration losses and other processes for a specific recharge area (Sawyer et al., 2016; Zhou et al., 2018, 2019). The groundwater flow model utilizes the calibrated hydraulic properties, hydrologic connections, stratigraphic data, aquifer properties, and recharge rates, etc (Befus et al., 2017; Zhou et al., 2018; Luijendijk et al., 2019). It is more complex than the water budget model and can illustrate flow paths and fresh groundwater contributions from heterogeneous groundwater systems (Zhou et al., 2018).

The old estimates based on the “One-step approach” yielded a global fresh SGD as 6% (Zektser et al., 2007) or 10% (Garrels and Mackenzie, 1971) of the global river discharge. For the study of Zektser (2007), Moore (2010) argued that it might underestimate the fresh SGD as it only includes fresh SGD from the shallow zones of the recharge zone and might miss fluxes from deeper zones. Using a water balance model, Sawyer et al. (2016) argued that the fresh SGD is equal to <2% of the river discharge for the US coastline. Based on a groundwater flow model, Befus et al. (2017) proposed that the fresh groundwater discharge to the eastern US and Gulf of Mexico coastline amounts to 13% of the river discharge. Zhou et al. (2018) conducted model comparison (water balance model and groundwater flow model) and inferred that the fresh SGD along the eastern US and Gulf of Mexico coastline is ~6% of the river discharge. Later, using a water balance approach, Zhou et al. (2019) determined a near-global fresh SGD to be ~1.3% of the global river discharge. The main factor leading to these different estimates—and the largest uncertainty in this approach overall—is the selection of a recharge zone for the groundwater flow regime. Larger recharge zones (Befus et al., 2017; Zhou et al., 2018) (using HUC8 or HydroSHEDS) generally lead to higher estimate while small recharge zones will yield lower estimate (Sawyer et al., 2016) (using NHDPlus). To sum up, those recent studies imply the fresh SGD is ~1.3%–13% of the river discharge on the continental or global scale, similar to the old

estimates of 6%–10%. It is also noted that one study, based on groundwater flow model, argues for a much lower fresh SGD, which is suggested to be 0.001%–0.6% of river discharge (Luijendijk et al., 2019). However, some of the results from this study are in conflict with local fresh SGD estimates. This approach also has to assume a recharge zone for the groundwater flow. Nonetheless, we still treated this study as one end member scenario, which highlights the large uncertainty in the current estimate of fresh SGD. To summarize, for the global estimates using the “One-step approach”, we chose a range of fresh SGD to be 1.3%–13% of river discharge in the normal scenario (“Groundwater\_one\_step” in Fig. DR5), and 0.001 % to 0.6% of river discharge in the second scenario (“Groundwater\_one\_step\_small” in Fig. DR5). The fresh SGD estimates using the “One-step approach” could be found in Table DR2.

The “Two-step approach” is a combination of the tracer approach and other measurements or modeling. The tracer approach is used to determine the total mixed SGD (Kwon et al., 2014; Cho and Kim, 2016). The principle of the tracer approach is straightforward. As radium ( $^{226}\text{Ra}$  and  $^{228}\text{Ra}$ ) is highly enriched in salty coastal groundwater relative to the ocean and river, small input of groundwater into the ocean can lead to a strong signal. Therefore, with the knowledge of radium isotope values in different components (e.g., river, ocean, suspended particle, sediment advection flux, groundwater) and the fluxes of different components (except for groundwater), one could obtain the groundwater contribution to the radium in coastal water. The short-lived radium isotopes ( $^{223}\text{Ra}$  and  $^{224}\text{Ra}$ ) can be used to evaluate the residence time or mixing rate of coastal waters (Moore et al., 2006) and further could be used to estimate radium fluxes from the ocean side.  $^{222}\text{Rn}$  (The daughter of  $^{226}\text{Ra}$ ) is highly enriched in both fresh and salty groundwater, and could also be useful in estimating the groundwater fluxes. Typically, based on these tracers, we will obtain the total flux of groundwater (fresh component and

modified seawater component). By integrating global observations of  $^{228}\text{Ra}$  with an inverse model, Kwon et al. (2014) argued that the mixed SGD in the coastlines between 60°S and 70°N is  $9\text{--}15 \times 10^{13} \text{ m}^3/\text{yr}$ , which is  $\sim 3$  times greater than the river discharge. In contrast, Cho and Kim (2016) stated that instead of 3 to 4 times, the global mixed SGD is approximately 90% to 175% of the river discharge, yielding a flux of  $3.2\text{--}5.6 \times 10^{13} \text{ m}^3/\text{yr}$ .

To estimate the proportion of fresh SGD in total SGD, we need to resort to specific seepage measurement, conductivity measurement, numerical modeling, stable isotope measurements, and a multi-component tracer approach (Garrison et al., 2003; Kim et al., 2003; Taniguchi and Iwakawa, 2004; Povinec et al., 2006; Taniguchi et al., 2006, 2008; Mulligan and Charette, 2006; Hays and Ullman, 2007; Kroeger et al., 2007; Beck et al., 2007; Niencheski et al., 2007; Sieyes et al., 2008; Leote et al., 2008; Santos et al., 2009; Lee et al., 2012; Russoniello et al., 2013; Null et al., 2014; Rodellas et al., 2015; Szymczycha and Pempkowiak, 2016; Sadat-Noori et al., 2016; Petermann et al., 2018; Chaillou et al., 2018; Chen et al., 2018; Adyasari et al., 2019). Note that the proportion of fresh SGD can also be estimated through numerical modeling (Li et al., 1999). The studies (Fig. DR4) estimating the proportion of fresh SGD in the mixed SGD range from 1% to 97%. Here we chose the majority results ranging from 1% to 50%. Multiplying the conservative global mixed SGD estimated by Cho and Kim (2016) with the proportion of fresh SGD in the mixed SGD, we arrived at a fresh SGD to be 1% to 77% of the total river discharge. The literature review on the total SGD and proportion of fresh SGD could be found in Table DR2.

With the result of global fresh SGD either from the “One-step approach” or from the “Two-step approach”, we could simply multiply this value with the global estimate of groundwater  $[\text{HCO}_3^-]$  to arrive at the global fresh SGD  $\text{HCO}_3^-$  flux. We note that the small end

member in the “One-step approach” (“Groundwater\_one\_step\_small”; Fig. DR5) predicted a much smaller value for both the global fresh SGD  $HCO_3^-$  flux ( $2.68 \times 10^{11}$  (25<sup>th</sup> percentile)– $8.15 \times 10^{11}$  (75<sup>th</sup> percentile), which is 1%–2% of the river flux) and the flux derived from silicate weathering ( $1.60 \times 10^{11}$ – $4.76 \times 10^{11}$ , which is 1%–3% of the river silicate flux). It is hard to judge whether this end member reflects the truth given the larger estimates predicted by the recent studies (normal scenarios; “Groundwater\_one\_step”; Fig. DR5) and the potential underestimation by this study. However, it does highlight that there are relatively large uncertainties in the extent of groundwater carbon sink, which provides a strong impetus to further constraining the extent of SGD on a global scale.

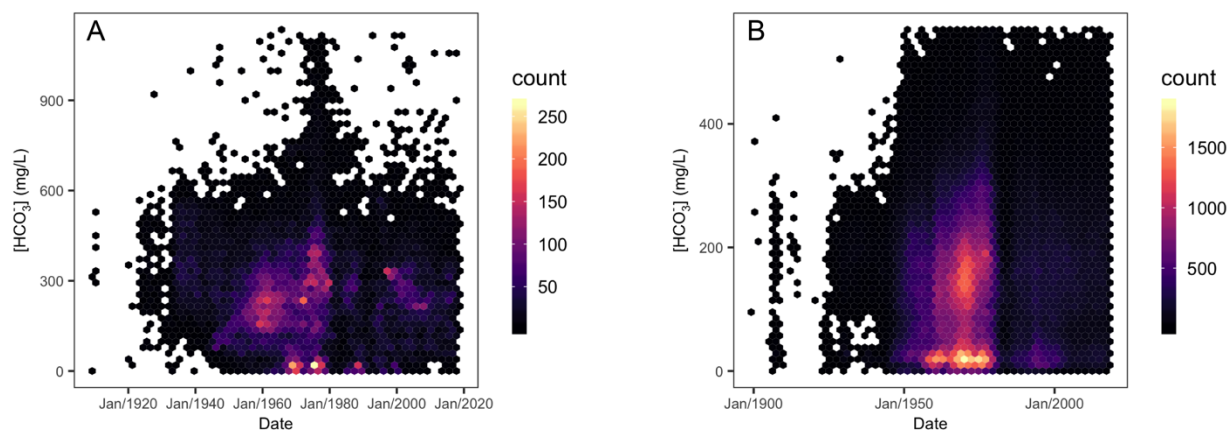

Fig. DR1 Density of  $HCO_3^-$  concentration ( $[HCO_3^-]$ ) as a function of the time across the contiguous United States. (A) Groundwater samples (B) River samples.



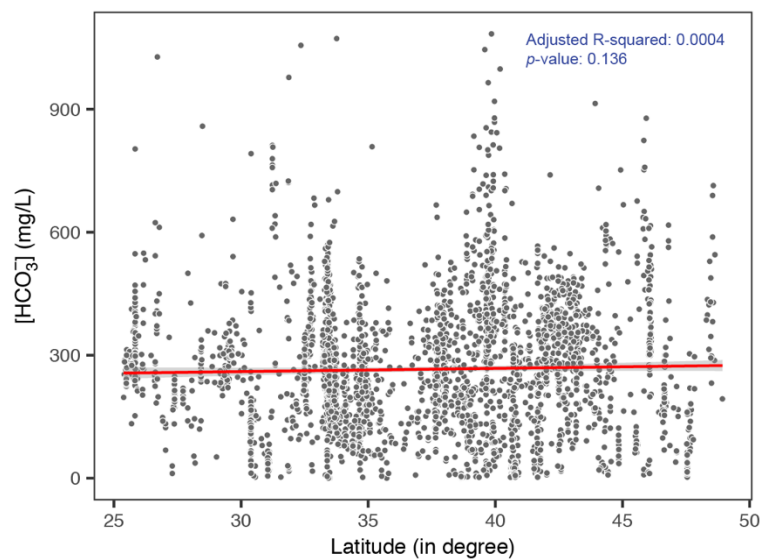

Fig. DR2  $HCO_3^-$  concentration ( $[HCO_3^-]$ ) in the groundwater as a function of the latitude of the sampling location across the contiguous United States.

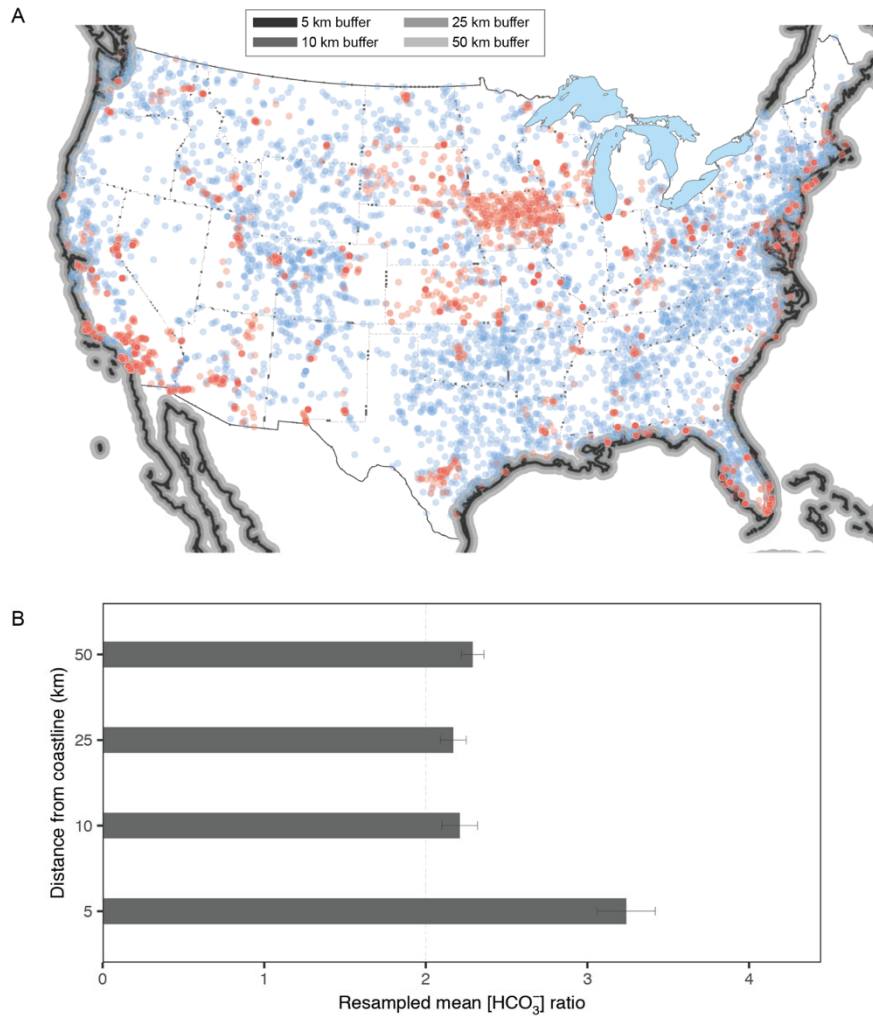

Fig. DR3 Buffer zone analysis for the groundwater and river samples. (A) Locations of river gauges and groundwater wells across the contiguous United States. Blue dots represent river samples and red dots represent groundwater samples. From dark grey to light grey, the width of the buffer zone increases from 5 km, through 10 km and 25 km, to 50 km. (B) Resampled mean  $[HCO_3^-]$  ratio of groundwater vs river located in the buffered zones of the US coastline. From bottom to top, the width of buffer zone increases from 5 km, through 10 km and 25 km, to 50 km. Error bars represent 1 SD for the resampled mean ratio.

169

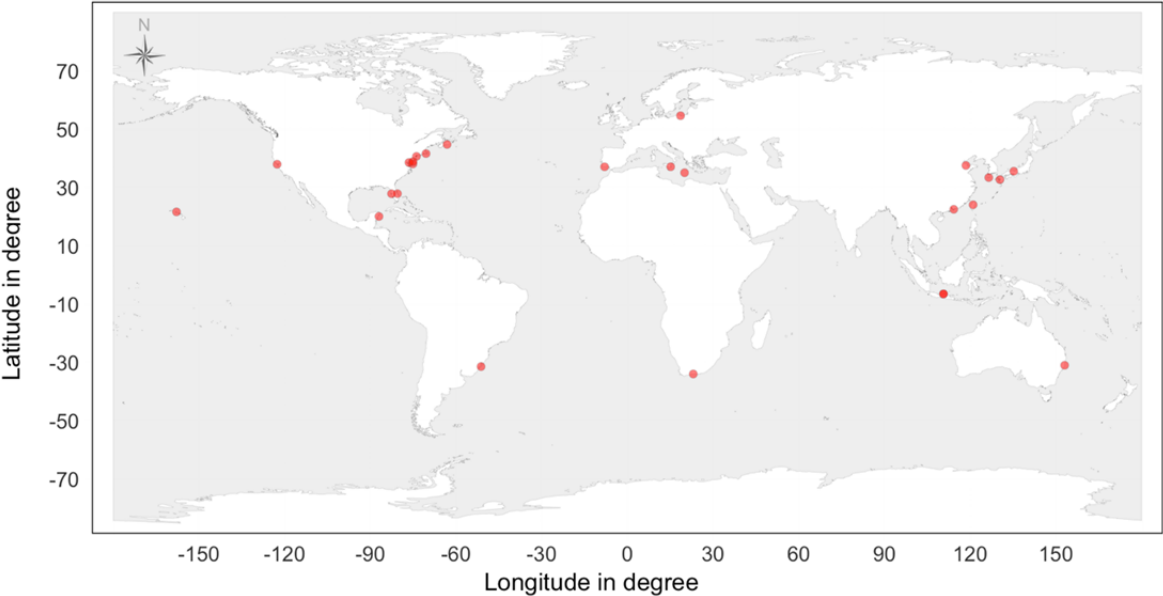

170

171 Fig. DR4 Locations that have the data for the proportion of fresh SGD in the total mixed SGD.

172 The locations can be found in Table DR2.

173

174

175

176

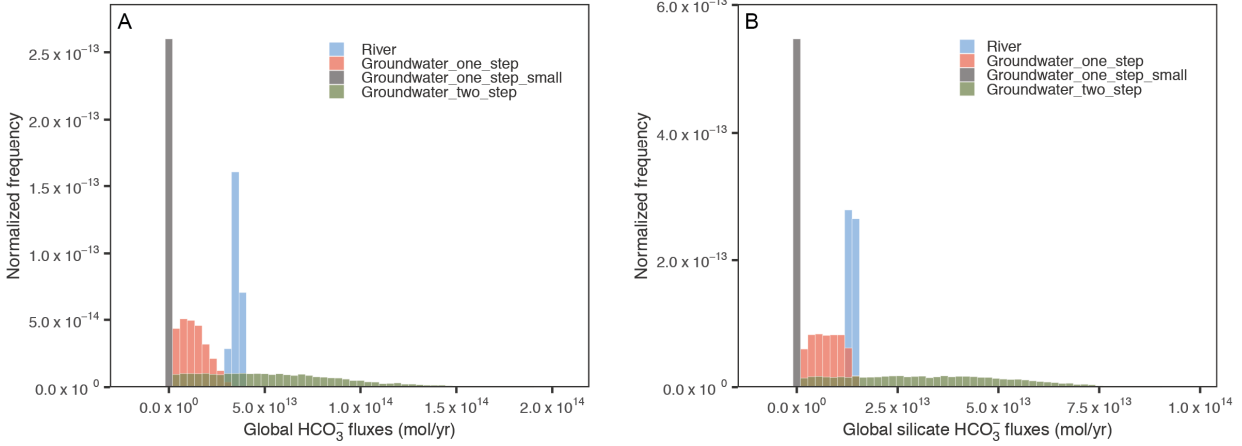

177

178 Fig. DR5 Global estimates of  $\text{HCO}_3^-$  fluxes from groundwaters and rivers. (A) Normalized  
 179 frequency of global  $\text{HCO}_3^-$  fluxes from groundwaters and rivers. (B) Normalized frequency of  
 180 global  $\text{HCO}_3^-$  fluxes from groundwaters and rivers in the silicate watersheds. The groundwater  
 181 estimates are based on the “One-step approach” and the “Two-step approach”. Blue color  
 182 represents river, red color represents the groundwater estimate using the “One-step approach”,  
 183 grey color represents the groundwater estimate using the small scenario of “One-step approach”,  
 184 and green color represents the groundwater estimate using the “Two-step approach”.

185

186 Table DR1: Data compilation for groundwater [ $HCO_3^-$ ] around the world.

| Parameter | Range (mmol/L) | Mean (mmol/L) | Mean $HCO_3^-$ (mmol/L) | Location                                  | Data source                 |
|-----------|----------------|---------------|-------------------------|-------------------------------------------|-----------------------------|
| $HCO_3^-$ | 0–17.7         | 4.4           | 4.4                     | Contiguous United States                  | This study                  |
| DIC       | 2–14.5         | 5.0           | 4.5                     | North Inlet, South Carolina               | Cai et al. (2003)           |
| DIC       | 16             | 16.0          | 14.4                    | Okatee Estuary, South Carolina            | Moore et al. (2006)         |
| $HCO_3^-$ | 0.095–13       | 3.5           | 3.5                     | Martinique and Guadeloupe volcanic island | Rad et al. (2007)           |
| $HCO_3^-$ | 2.008–4.016    | 3.0           | 3.0                     | Reunion volcanic island                   | Rad et al. (2007)           |
| DIC       | 4.125–6.625    | 5.4           | 4.8                     | northern South China Sea coastline        | Liu et al. (2012)           |
| DIC       | 0.73–9.36      | 5.1           | 4.5                     | the Baltic Sea coastline                  | Szymczycha et al. (2014)    |
| DIC       | 2.2–19.6       | 7.9           | 7.1                     | Godavari estuary, India                   | Rengarajan and Sarma (2015) |
| $HCO_3^-$ | 0.54–8.25      | 3.0           | 3.0                     | Taiwan coastal areas                      | Chen et al. (2018)          |
| DIC       | 0.36–8.675     | 3.2           | 3.0                     | Taiwan coastal areas                      | Wang et al. (2018)          |

187

188

189 Table DR2: Data compilation for the “One-step approach” and “Two-step approach”

| One-step approach of estimating fresh SGD          |               |                                       |                                            |                                 |
|----------------------------------------------------|---------------|---------------------------------------|--------------------------------------------|---------------------------------|
| Method                                             | Value         | Unit                                  | Location                                   | Data source                     |
| Water balance model                                | 10%           | percentage of river discharge         | global                                     | Garrels and Mackenzie (1971)    |
| hydrogeological model                              | 6% – 7%       | percentage of river discharge         | global                                     | Zekts et al. (2007)             |
| Water balance model                                | 1.3%          | percentage of river discharge         | global                                     | Zhou et al. (2019)              |
| Water balance model                                | <2%           | percentage of river discharge         | U.S. coastline                             | Sawyer et al. (2016)            |
| Groundwater flow model                             | 13%           | percentage of river discharge         | Eastern U.S. and Gulf of Mexico            | Befus et al. (2017)             |
| Water balance model and groundwater flow model     | 5% – 6%       | percentage of river discharge         | Eastern U.S. and Gulf of Mexico            | Zhou et al. (2018)              |
| Spatially resolved density-dependent model         | 0.001% – 0.6% | percentage of river discharge         | global                                     | Luijendijk et al. (2019)        |
| Two-step approach of estimating fresh SGD          |               |                                       |                                            |                                 |
| Step 1: Mixed SGD                                  |               |                                       |                                            |                                 |
| Method                                             | Value         | Unit                                  | Location                                   | Data source                     |
| Tracer                                             | 9 – 15        | $10^{13} \text{ m}^3 \text{ yr}^{-1}$ | global                                     | Kwon et al. (2014)              |
| Salinity-based tracer approach                     | 3.2 – 5.6     | $10^{13} \text{ m}^3 \text{ yr}^{-1}$ | global                                     | Cho and Kim (2016)              |
| Step 2: Percentage of fresh SGD in total mixed SGD |               |                                       |                                            |                                 |
| Method                                             | Value         | Unit                                  | Location                                   | Data source                     |
| Numerical simulation                               | 4             | %                                     | global                                     | Li et al. (1999)                |
| Tracer                                             | 10            | %                                     | The Chesapeake Bay, U.S.                   | Hussain et al. (1999)           |
| Integration of model and seepage                   | 2 – 22        | %                                     | Jeju Island the South Sea of Korea         | Kim et al. (2003)               |
| Integration of seepage, tracer and salinity        | 16            | %                                     | Kahana Bay in Hawaii                       | Garrison et al. (2003)          |
| Integration of model and seepage                   | 1 – 29        | %                                     | Osaka bay, Japan                           | Taniguchi and Iwakawa (2004)    |
| Integration of tracer and model                    | 80            | %                                     | Waquoit Bay, Massachusetts                 | Mulligan and Charette (2006)    |
| Stable isotope                                     | 40 – 50       | %                                     | south-eastern Sicily, Italy                | Povinec et al. (2006)           |
| Integration of conductivity and seepage            | 6.1 – 37.7    | %                                     | Kyushu island, Japan                       | Taniguchi et al. (2006)         |
| Integration of seepage and salinity                | 31.5          | %                                     | Cape Henlopen, Delaware                    | Hays and Ullman (2007)          |
| Model and tracer                                   | 36            | %                                     | Southern coast of Brazil                   | Niencheski et al. (2007)        |
| Integration of tracer and model                    | 3.3           | %                                     | Jamaica Bay, New York                      | Beck et al. (2007)              |
| Integration of tracer and model                    | 20 – 50       | %                                     | Tampa Bay, Florida                         | Kroeger et al. (2007)           |
| Seepage                                            | 10 – 30       | %                                     | the Ria Formosa, Portugal                  | Leote et al. (2008)             |
| Seepage and tracer                                 | 2 – 22        | %                                     | Bohai Sea, China                           | Taniguchi et al. (2008)         |
| Analytical models and water budget analysis        | 1.3 – 16      | %                                     | Stinson Beach, California                  | de Sieyes et al. (2008)         |
| Integration of tracer and salinity                 | 3 – 12        | %                                     | Gulf of Mexico                             | Santos et al. (2009)            |
| Integration of tracer and model                    | 3             | %                                     | Tolo Harbour, Hong Kong                    | Lee et al. (2012)               |
| Seepage                                            | 1.2 – 46      | %                                     | Indian River Bay, Delaware                 | Russoniello et al. (2013)       |
| Model and tracer                                   | 2             | %                                     | Coast of the Yucatan Peninsula             | Null et al. (2014)              |
| Integration of tracer and model                    | 1 – 25        | %                                     | Mediterranean Sea                          | Rodellas et al. (2015)          |
| Geochemical methods                                | 18 – 45       | %                                     | Bay of Puck along the Polish coast         | Symczycha and Pempkowiak (2016) |
| Seepage and tracer                                 | 59            | %                                     | Subtropical estuary of Hat Head, Australia | Sadat-Noori et al. (2016)       |
| Tracer and stable isotopes                         | 30 – 97       | %                                     | Martinique Beach of Quebec                 | Chaillou et al. (2018)          |
| Tracer                                             | 23            | %                                     | Knysna Estuary, South Africa               | Petermann et al. (2018)         |
| Integration of seepage and salinity                | 36            | %                                     | Taiwan coastline                           | Chen et al. (2018)              |
| Tracer                                             | 40            | %                                     | Awur beach of Indonesia                    | Adyasari et al. (2019)          |
| Tracer                                             | 3             | %                                     | Bandengan beach of Indonesia               | Adyasari et al. (2019)          |

## REFERENCES CITED

- Adyasari, D., Oehler, T., Afiati, N., and Moosdorf, N., 2019, Environmental impact of nutrient fluxes associated with submarine groundwater discharge at an urbanized tropical coast: *Estuarine, Coastal and Shelf Science*, v. 221, p. 30–38, doi:10.1016/j.ecss.2019.03.009.
- Beck, A.J., Rapaglia, J.P., Cochran, J.K., and Bokuniewicz, H.J., 2007, Radium mass-balance in Jamaica Bay, NY: Evidence for a substantial flux of submarine groundwater: *Marine Chemistry*, v. 106, p. 419–441, doi:10.1016/j.marchem.2007.03.008.
- Befus, K., Kroeger, K.D., Smith, C.G., and Swarzenski, P.W., 2017, The magnitude and origin of groundwater discharge to eastern U.S. and Gulf of Mexico coastal waters: *Geophysical Research Letters*, v. 44, p. 1039610406, doi:10.1002/2017GL075238.
- Cai, W.-J., Wang, Y., Krest, J., and Moore, W.S., 2003, The geochemistry of dissolved inorganic carbon in a surficial groundwater aquifer in North Inlet, South Carolina, and the carbon fluxes to the coastal ocean: *Geochimica et Cosmochimica Acta*, v. 67, p. 631–639, doi:10.1016/S0016-7037(02)01167-5.
- Chaillou, G., Lemay-Borduas, F., Larocque, M., Couturier, M., Biehler, A., and Tommi-Morin, G., 2018, Flow and discharge of groundwater from a snowmelt-affected sandy beach: *Journal of Hydrology*, v. 557, p. 4–15, doi:10.1016/j.jhydrol.2017.12.010.
- Chen, C.-T.A., Zhang, J., Peng, T.-R., Kandasamy, S., Wang, D., and Lin, Y.-J., 2018, Submarine groundwater discharge around Taiwan: *Acta Oceanologica Sinica*, v. 37, p. 18–22, doi:10.1007/s13131-018-1216-2.
- Cho, H., and Kim, G., 2016, Determining groundwater Ra end-member values for the estimation of the magnitude of submarine groundwater discharge using Ra isotope tracers: *Geophysical Research Letters*, v. 43, p. 3865–3871, doi:10.1002/2016GL068805.
- Garrels, R.M., and Mackenzie, F.T., 1971, *Evolution of Sedimentary Rocks*: Norton & Co.: New York.
- Garrison, G.H., Glenn, C.R., and McMurtry, G.M., 2003, Measurement of submarine groundwater discharge in Kahana Bay, O’ahu, Hawai’i: *Limnology and Oceanography*, v. 48, p. 920–928, doi:10.4319/lo.2003.48.2.0920.
- Hays, R.L., and Ullman, W.J., 2007, Direct determination of total and fresh groundwater discharge and nutrient loads from a sandy beachface at low tide (Cape Henlopen, Delaware): *Limnology and Oceanography*, v. 52, p. 240–247, doi:10.4319/lo.2007.52.1.0240.
- Kim, G., Lee, K.-K., Park, K.-S., Hwang, D.-W., and Yang, H.-S., 2003, Large submarine groundwater discharge (SGD) from a volcanic island: *Geophysical Research Letters*, v. 30, doi:10.1029/2003GL018378.

227 Kroeger, K.D., Swarzenski, P.W., Greenwood, Wm.J., and Reich, C., 2007, Submarine  
 228 groundwater discharge to Tampa Bay: Nutrient fluxes and biogeochemistry of the coastal  
 229 aquifer: *Marine Chemistry*, v. 104, p. 85–97, doi:10.1016/j.marchem.2006.10.012.

230 Kwon, E.Y., Kim, G., Primeau, F., Moore, W.S., Cho, H.-M., DeVries, T., Sarmiento, J.L.,  
 231 Charette, M.A., and Cho, Y.-K., 2014, Global estimate of submarine groundwater  
 232 discharge based on an observationally constrained radium isotope model: *Geophysical*  
 233 *Research Letters*, v. 41, p. 2014GL061574, doi:10.1002/2014GL061574.

234 Lee, C.M., Jiao, J.J., Luo, X., and Moore, W.S., 2012, Estimation of submarine groundwater  
 235 discharge and associated nutrient fluxes in Tolo Harbour, Hong Kong: *Science of The*  
 236 *Total Environment*, v. 433, p. 427–433, doi:10.1016/j.scitotenv.2012.06.073.

237 Leote, C., Ibánhez, J.S., and Rocha, C., 2008, Submarine Groundwater Discharge as a nitrogen  
 238 source to the Ria Formosa studied with seepage meters: *Biogeochemistry*, v. 88, p. 185–  
 239 194, doi:10.1007/s10533-008-9204-9.

240 Li, L., Barry, D.A., Stagnitti, F., and Parlange, J.-Y., 1999, Submarine groundwater discharge  
 241 and associated chemical input to a coastal sea: *Water Resources Research*, v. 35, p. 3253–  
 242 3259, doi:10.1029/1999WR900189.

243 Liu, Q., Dai, M., Chen, W., Huh, C.-A., Wang, G., Li, Q., and Charette, M.A., 2012, How  
 244 significant is submarine groundwater discharge and its associated dissolved inorganic  
 245 carbon in a river-dominated shelf system? *Biogeosciences*, v. 9, p. 1777–1795,  
 246 doi:https://doi.org/10.5194/bg-9-1777-2012.

247 Luijendijk, E., Gleeson, T., and Moosdorf, N., 2019, The flow of fresh groundwater and solutes  
 248 to the world’s oceans and coastal ecosystems: *EarthArXiv preprint*,  
 249 doi:10.31223/osf.io/sw8r4.

250 Moore, W.S., 2010, A reevaluation of submarine groundwater discharge along the southeastern  
 251 coast of North America: *Global Biogeochemical Cycles*, v. 24,  
 252 doi:10.1029/2009GB003747.

253 Moore, W.S., Blanton, J.O., and Joye, S.B., 2006, Estimates of flushing times, submarine  
 254 groundwater discharge, and nutrient fluxes to Okatee Estuary, South Carolina: *Journal of*  
 255 *Geophysical Research: Oceans*, v. 111, doi:10.1029/2005JC003041.

256 Mulligan, A.E., and Charette, M.A., 2006, Intercomparison of submarine groundwater discharge  
 257 estimates from a sandy unconfined aquifer: *Journal of Hydrology*, v. 327, p. 411–425,  
 258 doi:10.1016/j.jhydrol.2005.11.056.

259 Niencheski, L.F.H., Windom, H.L., Moore, W.S., and Jahnke, R.A., 2007, Submarine  
 260 groundwater discharge of nutrients to the ocean along a coastal lagoon barrier, Southern  
 261 Brazil: *Marine Chemistry*, v. 106, p. 546–561, doi:10.1016/j.marchem.2007.06.004.

262 Null, K.A., Knee, K.L., Crook, E.D., de Sieyes, N.R., Rebolledo-Vieyra, M., Hernández-  
 263 Terrones, L., and Paytan, A., 2014, Composition and fluxes of submarine groundwater



264 along the Caribbean coast of the Yucatan Peninsula: *Continental Shelf Research*, v. 77, p.  
265 38–50, doi:10.1016/j.csr.2014.01.011.

266 Petermann, E., Knöller, K., Rocha, C., Scholten, J., Stollberg, R., Weiß, H., and Schubert, M.,  
267 2018, Coupling End-Member Mixing Analysis and Isotope Mass Balancing (222-Rn) for  
268 Differentiation of Fresh and Recirculated Submarine Groundwater Discharge Into  
269 Knysna Estuary, South Africa: *Journal of Geophysical Research: Oceans*, v. 123, p. 952–  
270 970, doi:10.1002/2017JC013008.

271 Povinec, P.P. et al., 2006, Characterisation of submarine groundwater discharge offshore south-  
272 eastern Sicily: *Journal of Environmental Radioactivity*, v. 89, p. 81–101,  
273 doi:10.1016/j.jenvrad.2006.03.008.

274 Rad, S.D., Allègre, C.J., and Louvat, P., 2007, Hidden erosion on volcanic islands: *Earth and*  
275 *Planetary Science Letters*, v. 262, p. 109–124, doi:10.1016/j.epsl.2007.07.019.

276 Rengarajan, R., and Sarma, V.V.S.S., 2015, Submarine groundwater discharge and nutrient  
277 addition to the coastal zone of the Godavari estuary: *Marine Chemistry*, v. 172, p. 57–69,  
278 doi:10.1016/j.marchem.2015.03.008.

279 Rodellas, V., Garcia-Orellana, J., Masqué, P., Feldman, M., and Weinstein, Y., 2015, Submarine  
280 groundwater discharge as a major source of nutrients to the Mediterranean Sea:  
281 *Proceedings of the National Academy of Sciences*, v. 112, p. 3926–3930,  
282 doi:10.1073/pnas.1419049112.

283 Russoniello, C.J., Fernandez, C., Bratton, J.F., Banaszak, J.F., Krantz, D.E., Andres, A.S.,  
284 Konikow, L.F., and Michael, H.A., 2013, Geologic effects on groundwater salinity and  
285 discharge into an estuary: *Journal of Hydrology*, v. 498, p. 1–12,  
286 doi:10.1016/j.jhydrol.2013.05.049.

287 Sadat-Noori, M., Santos, I.R., Tait, D.R., and Maher, D.T., 2016, Fresh meteoric versus  
288 recirculated saline groundwater nutrient inputs into a subtropical estuary: *Science of The*  
289 *Total Environment*, v. 566–567, p. 1440–1453, doi:10.1016/j.scitotenv.2016.06.008.

290 Santos, I.R., Burnett, W.C., Dittmar, T., Suryaputra, I.G.N.A., and Chanton, J., 2009, Tidal  
291 pumping drives nutrient and dissolved organic matter dynamics in a Gulf of Mexico  
292 subterranean estuary: *Geochimica et Cosmochimica Acta*, v. 73, p. 1325–1339,  
293 doi:10.1016/j.gca.2008.11.029.

294 Sawyer, A.H., David, C.H., and Famiglietti, J.S., 2016, Continental patterns of submarine  
295 groundwater discharge reveal coastal vulnerabilities: *Science*, p. aag1058,  
296 doi:10.1126/science.aag1058.

297 Schopka, H.H., and Derry, L.A., 2012, Chemical weathering fluxes from volcanic islands and the  
298 importance of groundwater: *The Hawaiian example: Earth and Planetary Science Letters*,  
299 v. 339–340, p. 67–78, doi:10.1016/j.epsl.2012.05.028.

- Sieyes, N.R. de, Yamahara, K.M., Layton, B.A., Joyce, E.H., and Boehm, A.B., 2008, Submarine discharge of nutrient-enriched fresh groundwater at Stinson Beach, California is enhanced during neap tides: *Limnology and Oceanography*, v. 53, p. 1434–1445, doi:10.4319/lo.2008.53.4.1434.
- Szymczycha, B., Maciejewska, A., Winogradow, A., and Pempkowiak, J., 2014, Could submarine groundwater discharge be a significant carbon source to the southern Baltic Sea? The study reports the results obtained within the framework of the following projects: the statutory activities of the Institute of Oceanology Polish Academy of Sciences theme 2.2, research project No. 2012/05/N/ST10/02761 sponsored by the National Science Centre, and AMBER, the BONUS+EU FP6 Project.: *Oceanologia*, v. 56, p. 327–347, doi:10.5697/oc.56-2.327.
- Szymczycha, B., and Pempkowiak, J., 2016, *The Role of Submarine Groundwater Discharge as Material Source to the Baltic Sea*: Springer International Publishing, GeoPlanet: Earth and Planetary Sciences, //www.springer.com/us/book/9783319259598 (accessed November 2018).
- Taniguchi, M., Ishitobi, T., Chen, J., Onodera, S., Miyaoka, K., Burnett, W.C., Peterson, R., Liu, G., and Fukushima, Y., 2008, Submarine groundwater discharge from the Yellow River Delta to the Bohai Sea, China: *Journal of Geophysical Research: Oceans*, v. 113, doi:10.1029/2007JC004498.
- Taniguchi, M., Ishitobi, T., and Shimada, J., 2006, Dynamics of submarine groundwater discharge and freshwater-seawater interface: *Journal of Geophysical Research: Oceans*, v. 111, doi:10.1029/2005JC002924.
- Taniguchi, M., and Iwakawa, H., 2004, Submarine groundwater discharge in Osaka Bay, Japan: *Limnology*, v. 5, p. 25–32, doi:10.1007/s10201-003-0112-3.
- Wang, S.-L. et al., 2018, Submarine Groundwater Discharge helps making nearshore waters heterotrophic: *Scientific Reports*, v. 8, p. 11650, doi:10.1038/s41598-018-30056-x.
- Zektser, I.S., Everett, L.G., and Dzhamalov, R.G., 2007, *Submarine Groundwater*: CRC Press, 466 p.
- Zhou, Y., Befus, K.M., Sawyer, A.H., and David, C.H., 2018, Opportunities and Challenges in Computing Fresh Groundwater Discharge to Continental Coastlines: A Multimodel Comparison for the United States Gulf and Atlantic Coasts: *Water Resources Research*, v. 54, p. 8363–8380, doi:10.1029/2018WR023126.
- Zhou, Y., Sawyer, A.H., David, C.H., and Famiglietti, J.S., 2019, Fresh Submarine Groundwater Discharge to the Near-Global Coast: *Geophysical Research Letters*, v. 0, doi:10.1029/2019GL082749.
